# Supplementary material for: Training a medical workforce to meet the needs of diverse minority communities
Source: PubMed Central journal article supplement (PMC5251211; doi:10.1186/s12909-017-0858-7), 2017-01-21
Supplement: 12909_2017_858_MOESM1_ESM.pdf [file 12909_2017_858_MOESM1_ESM.pdf]

**Otago Medical School Pacific Immersion Programme (PIP) Evaluation Questionnaire**

**Section A:**

*(Please tick the appropriate corresponding box)*

|                                                                                                                            | Strongly Disagree        | Disagree                 | Somewhat Agree           | Agree                    | Strongly Agree           |
|----------------------------------------------------------------------------------------------------------------------------|--------------------------|--------------------------|--------------------------|--------------------------|--------------------------|
| 1) There are differences in my upbringing compared to Pacific Peoples                                                      | <input type="checkbox"/> | <input type="checkbox"/> | <input type="checkbox"/> | <input type="checkbox"/> | <input type="checkbox"/> |
| 2) I am interested in learning more about Pacific Peoples                                                                  | <input type="checkbox"/> | <input type="checkbox"/> | <input type="checkbox"/> | <input type="checkbox"/> | <input type="checkbox"/> |
| 3) Physicians can give excellent health care without understanding their patient's cultural background                     | <input type="checkbox"/> | <input type="checkbox"/> | <input type="checkbox"/> | <input type="checkbox"/> | <input type="checkbox"/> |
| 4) Understanding a Pacific patient's cultural perspective on health is essential to the provision of effective health care | <input type="checkbox"/> | <input type="checkbox"/> | <input type="checkbox"/> | <input type="checkbox"/> | <input type="checkbox"/> |
| 5) I am conscious of cultural differences when interacting with people from other cultures                                 | <input type="checkbox"/> | <input type="checkbox"/> | <input type="checkbox"/> | <input type="checkbox"/> | <input type="checkbox"/> |
| 6) I am open to learning new things in a different environment                                                             | <input type="checkbox"/> | <input type="checkbox"/> | <input type="checkbox"/> | <input type="checkbox"/> | <input type="checkbox"/> |
| 7) I enjoy interacting with people from different cultures                                                                 | <input type="checkbox"/> | <input type="checkbox"/> | <input type="checkbox"/> | <input type="checkbox"/> | <input type="checkbox"/> |
| 8) I am open to living in a culture that is unfamiliar to me                                                               | <input type="checkbox"/> | <input type="checkbox"/> | <input type="checkbox"/> | <input type="checkbox"/> | <input type="checkbox"/> |
| 9) I show the same regard for other cultural points of view as I do for my own culture                                     | <input type="checkbox"/> | <input type="checkbox"/> | <input type="checkbox"/> | <input type="checkbox"/> | <input type="checkbox"/> |

**Section B:**

*(Please tick the appropriate corresponding box)*

|                                                                                                                                                          | Strongly Disagree        | Disagree                 | Somewhat Agree           | Agree                    | Strongly Agree           |
|----------------------------------------------------------------------------------------------------------------------------------------------------------|--------------------------|--------------------------|--------------------------|--------------------------|--------------------------|
| 1) I know some cultural values and/or protocols of Pacific cultures                                                                                      | <input type="checkbox"/> | <input type="checkbox"/> | <input type="checkbox"/> | <input type="checkbox"/> | <input type="checkbox"/> |
| 2) I know some traditional health beliefs and/or practices in Pacific cultures                                                                           | <input type="checkbox"/> | <input type="checkbox"/> | <input type="checkbox"/> | <input type="checkbox"/> | <input type="checkbox"/> |
| 3) I know about the main health challenges faced by Pacific Peoples in New Zealand<br>(If you know, please name three you consider to be most important) | <input type="checkbox"/> | <input type="checkbox"/> | <input type="checkbox"/> | <input type="checkbox"/> | <input type="checkbox"/> |
| I. _____                                                                                                                                                 |                          |                          |                          |                          |                          |
| II. _____                                                                                                                                                |                          |                          |                          |                          |                          |
| III. _____                                                                                                                                               |                          |                          |                          |                          |                          |

*(Section B continues over the page)*

**(Section B continued)**

*(Please tick the appropriate corresponding box)*

4) When addressing Public Health issues in a Pacific community it is important to work with:

- Individuals
- Families
- Community

5) These are factors that influence access to health services in New Zealand for Pacific Peoples

- Cost
- Transport
- Language
- Traditional Medicine
- Unemployment
- Level of Education

| Strongly Disagree        | Disagree                 | Somewhat Agree           | Agree                    | Strongly Agree           |
|--------------------------|--------------------------|--------------------------|--------------------------|--------------------------|
| <input type="checkbox"/> | <input type="checkbox"/> | <input type="checkbox"/> | <input type="checkbox"/> | <input type="checkbox"/> |
| <input type="checkbox"/> | <input type="checkbox"/> | <input type="checkbox"/> | <input type="checkbox"/> | <input type="checkbox"/> |
| <input type="checkbox"/> | <input type="checkbox"/> | <input type="checkbox"/> | <input type="checkbox"/> | <input type="checkbox"/> |
| <input type="checkbox"/> | <input type="checkbox"/> | <input type="checkbox"/> | <input type="checkbox"/> | <input type="checkbox"/> |
| <input type="checkbox"/> | <input type="checkbox"/> | <input type="checkbox"/> | <input type="checkbox"/> | <input type="checkbox"/> |
| <input type="checkbox"/> | <input type="checkbox"/> | <input type="checkbox"/> | <input type="checkbox"/> | <input type="checkbox"/> |
| <input type="checkbox"/> | <input type="checkbox"/> | <input type="checkbox"/> | <input type="checkbox"/> | <input type="checkbox"/> |

Please list any other factors that you know influence access to health services in New Zealand for Pacific Peoples

---

---

---

---

---



---

---

---

---

---

**Section C:**

*(Please tick the appropriate corresponding box)*

1) I feel confident using Pacific cultural greetings when speaking with Pacific Peoples

| Strongly Disagree        | Disagree                 | Somewhat Agree           | Agree                    | Strongly Agree           |
|--------------------------|--------------------------|--------------------------|--------------------------|--------------------------|
| <input type="checkbox"/> | <input type="checkbox"/> | <input type="checkbox"/> | <input type="checkbox"/> | <input type="checkbox"/> |

Please list the communication skills you have that will help you to work with Pacific patients, families and communities

---

---

---

---

---



---

---

---

---

---

***Thank you for taking the time to complete this survey.  
We appreciate your involvement in the programme.***
